# Supplementary material
Source: publisher figshare collection journal article supplement (https://sage.figshare.com/ndownloader/files/17722598)
Supplement: Supplementary file 1 [file 17722598]

**Supplementary**

**Elevated biogas production from the anaerobic co-digestion of farmhouse waste: Insight into the process  
performance and kinetics**

Spyridon Achinas\*, Gerrit Jan Willem Euverink

Faculty of Science and Engineering, University of Groningen, Nijenborgh 4, 9747 AG Groningen, Netherlands

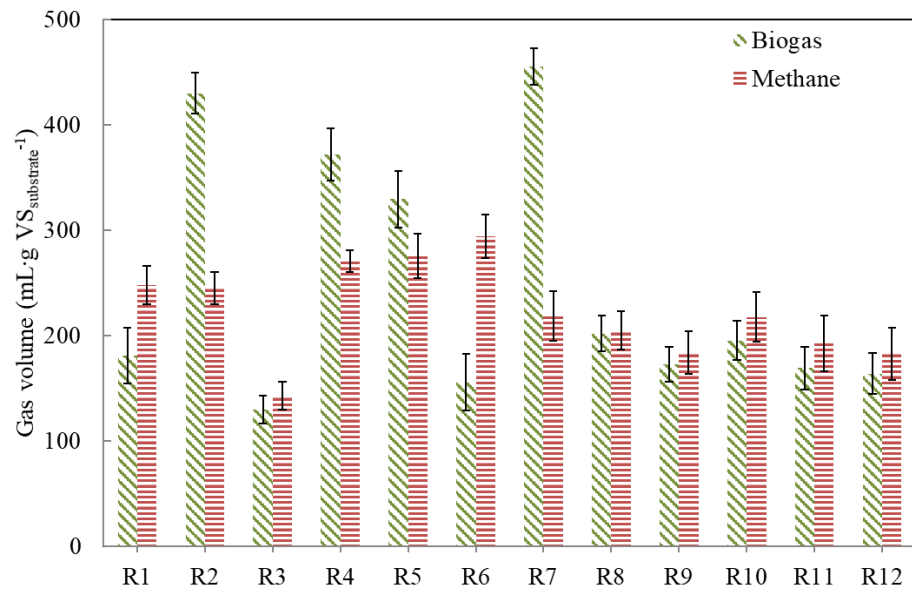

Figure S-1 Biogas and methane production for the mono-digestion (R1→3) and co-digestion (R4→12) tests.

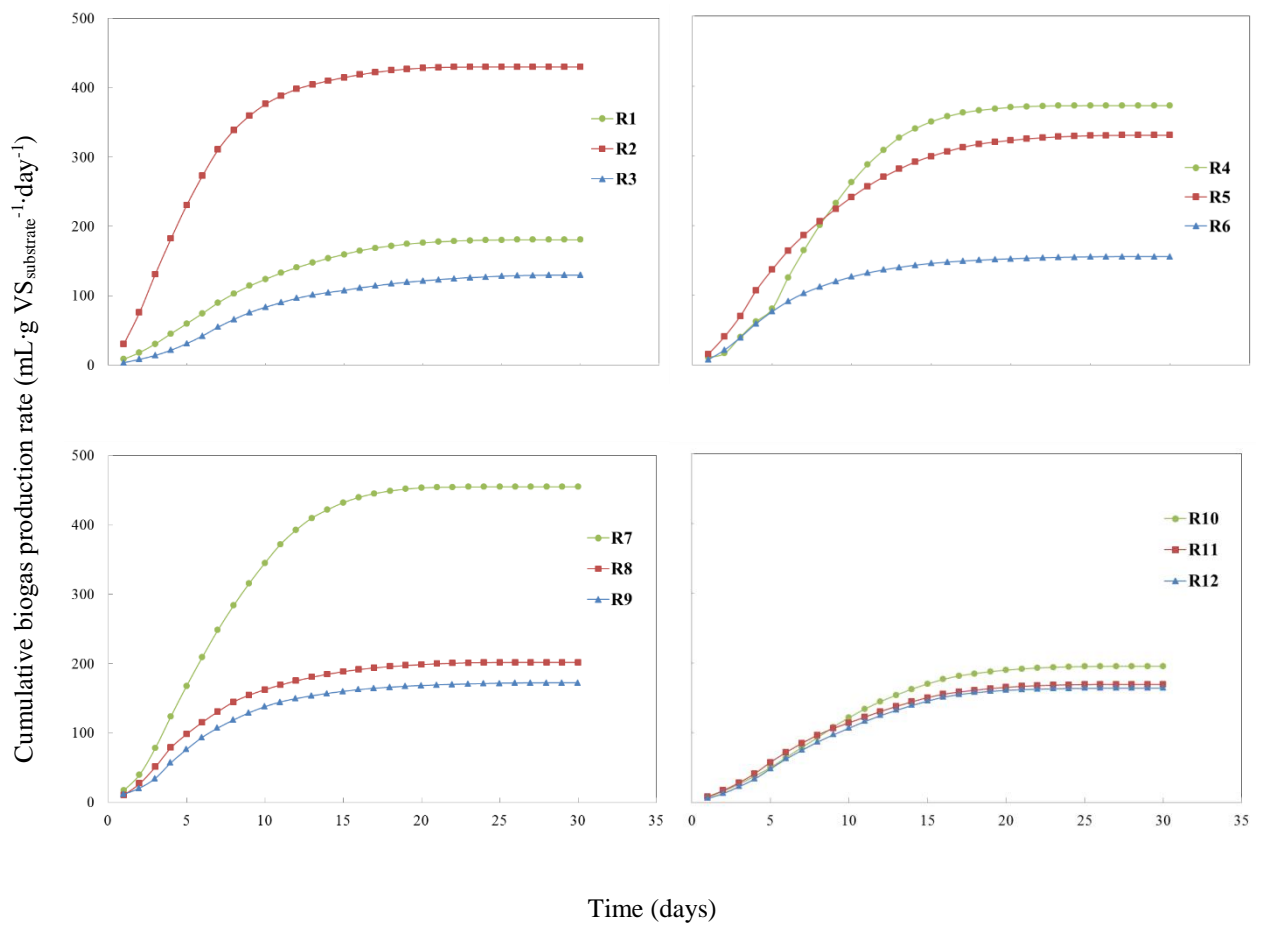

Figure S-2 Cumulative biogas production for the mono-digestion (R1→3) and co-digestion (R4→12) tests.

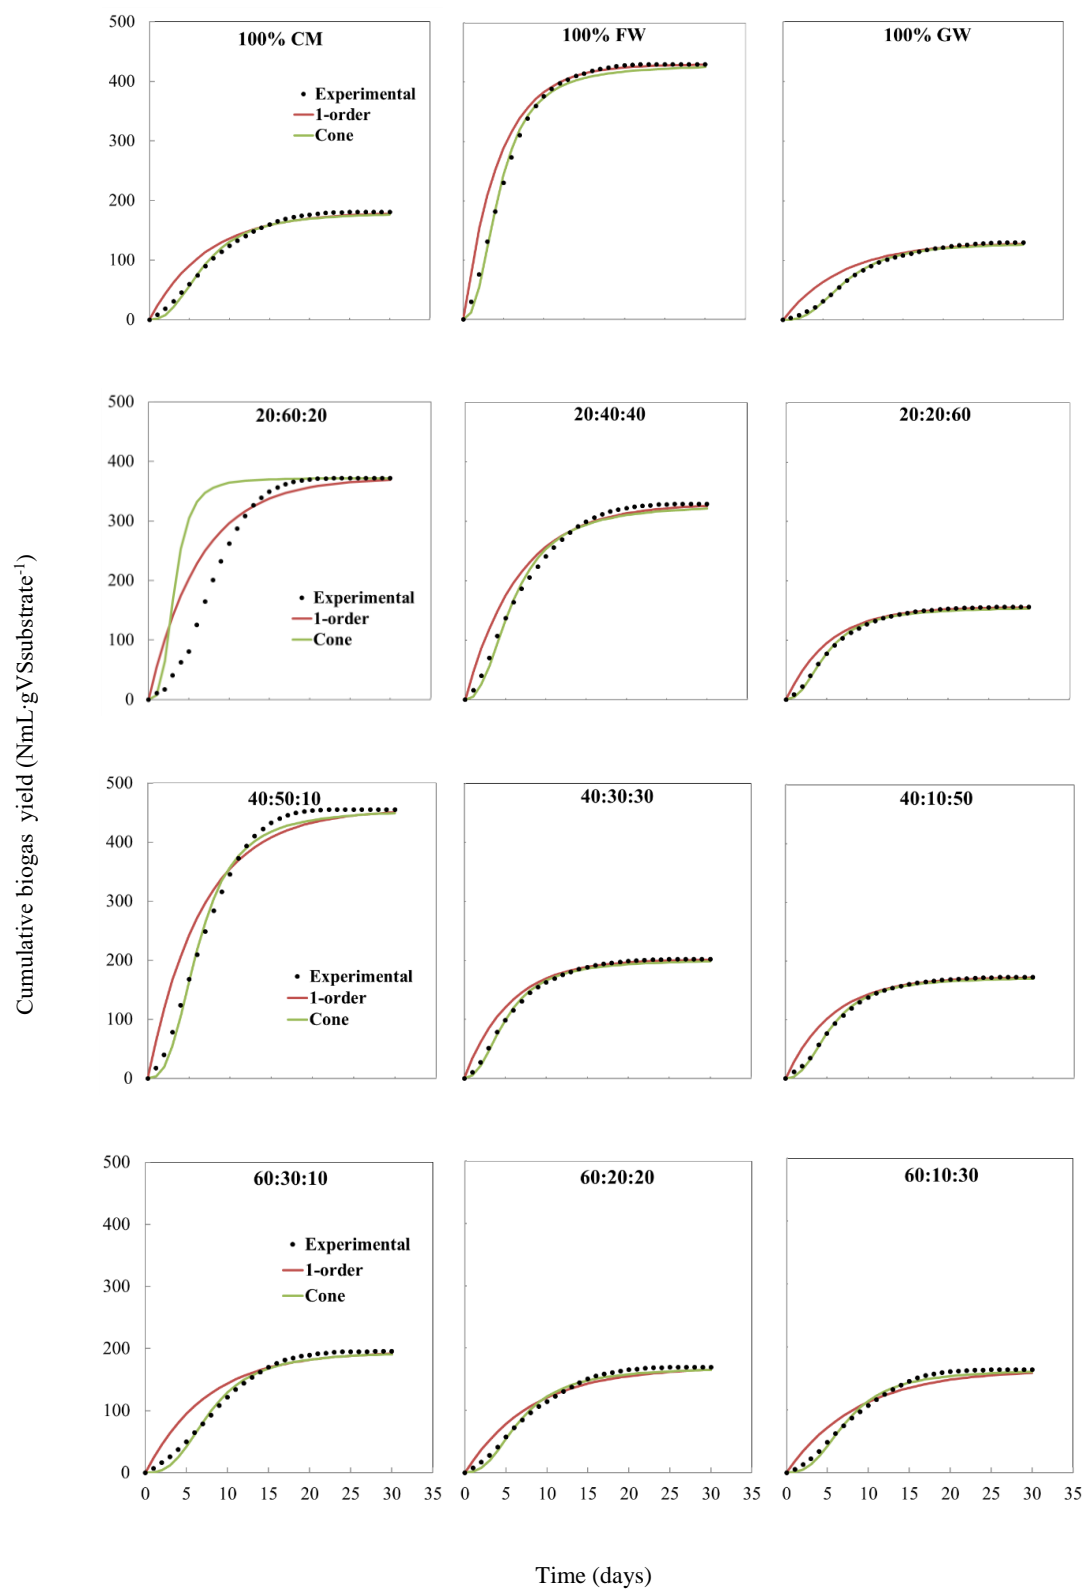

Figure S-3 Plot of measured and predicted biogas yields for the mono-digestion (R1→3) and co-digestion (R4→12) tests.

Table S - 1 Biogas yield, VS removal and technical digestion time for all the reactors.

| Particular | Biogas yield                                  | VS removal | T <sub>80</sub> |
|------------|-----------------------------------------------|------------|-----------------|
|            | (mL·g VS <sub>substrate</sub> <sup>-1</sup> ) | (%)        | (d)             |
| R1         | 180.8 (14.3)                                  | 41.7 (3.9) | 7               |
| R2         | 429.9 (16.7)                                  | 43.5 (2.6) | 12              |
| R3         | 129.8 (13.5)                                  | 30.8 (2.8) | 15              |
| R4         | 371.9 (19.4)                                  | 45.4 (4.1) | 6               |
| R5         | 329.5 (20.2)                                  | 44.0 (3.9) | 6               |
| R6         | 155.8 (15.3)                                  | 48.2 (4.6) | 8               |
| R7         | 455.1 (19.6)                                  | 36.1 (2.5) | 8               |
| R8         | 201.9 (16.8)                                  | 35.6 (3.0) | 12              |
| R9         | 172.7 (10.9)                                  | 31.9 (2.7) | 14              |
| R10        | 195.3 (17.1)                                  | 37.5 (3.4) | 9               |
| R11        | 169.3 (16.3)                                  | 38.6 (2.9) | 10              |
| R12        | 163.9 (12.7)                                  | 35.3 (3.1) | 8               |

Values are the average of three determinations and numbers in parentheses are the standard deviations.
